# Supplementary material
Source: Royal Society of Chemistry journal article supplement (doi:10.1039/d6ay00512h)
Supplement: d6ay00512h1.pdf [file d6ay00512h1.pdf]

**Low-viscosity hydrophobic deep eutectic solvent based ferrofluid for  
simultaneous vortex-assisted liquid-liquid microextraction of UV  
filters and parabens from environmental waters**

Kaige Zhang<sup>1, 2\*</sup>, Yanrong Chen<sup>2</sup>, Jing Wang<sup>2</sup>, Lijun He<sup>3</sup>, Qianchun Zhang<sup>1\*</sup>

<sup>1</sup> School of Biology and Chemistry, Key Laboratory for Analytical Science of Food and Environment Pollution of Qian Xi Nan, Xingyi Normal University for Nationalities, Xingyi 562400, China

<sup>2</sup> School of Environment, Key Laboratory of Yellow River and Huai River Water Environment and Pollution Control, Ministry of Education, Henan Key Laboratory of Environmental Pollution Control, Henan Normal University, Xinxiang 453007, China

<sup>3</sup> School of Chemistry and Chemical Engineering, Henan University of Technology, Zhengzhou 450001, China

Corresponding authors: Kaige Zhang, Qianchun Zhang

Tel.:+86-859-3296359

Fax:+86-859-3527567

E-mail addresses: zhangkaige@htu.edu.cn (Kaige Zhang)

qianchunzhang@qq.com (Qianchun Zhang)

### **Preparation of Fe<sub>3</sub>O<sub>4</sub> magnetic nanoparticles**

Firstly, FeCl<sub>3</sub> • 6H<sub>2</sub>O (5.2 g) and FeCl<sub>2</sub> • 4H<sub>2</sub>O (2.2 g) were added to a 250 mL three necked flask containing 160 mL of ultrapure water. Then, the mixture was sonicated for 20 min, and then mechanically stirred in an 80 °C oil bath for 20 min. With the mixture completely dissolved, 30 mL of ammonia solution was quickly added and continued stirring for 30 min. The entire reaction process was carried out in nitrogen atmosphere. After the reaction was completed, the precipitate, namely Fe<sub>3</sub>O<sub>4</sub> nanoparticles, was collected using an external magnet and washed alternately with water and ethanol several times. Finally, the Fe<sub>3</sub>O<sub>4</sub> particle was dried in a 60 °C vacuum drying oven for 12 hours.

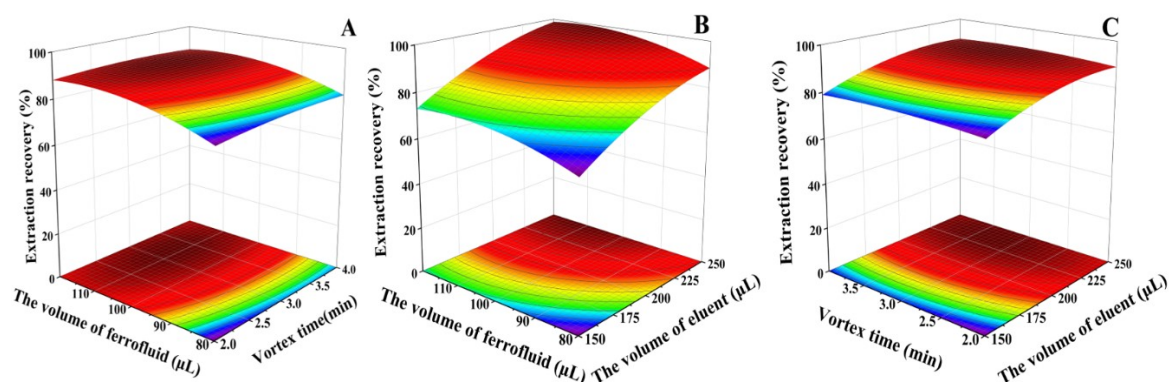

Figure 1 Response surface plots and contour plots for the recovery extraction recovery of UVFs using CCD. (A) The volume of ferrofluid versus vortex time; (B) the volume of ferrofluid versus the volume of eluent; (C) vortex time versus the volume of eluent.

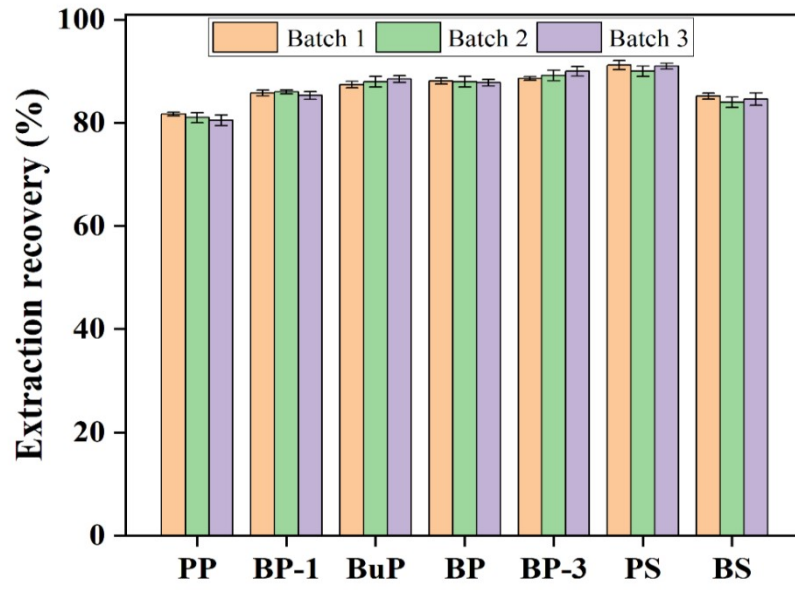

Figure 2 Inter-batch repeatability of the prepared ferrofluids

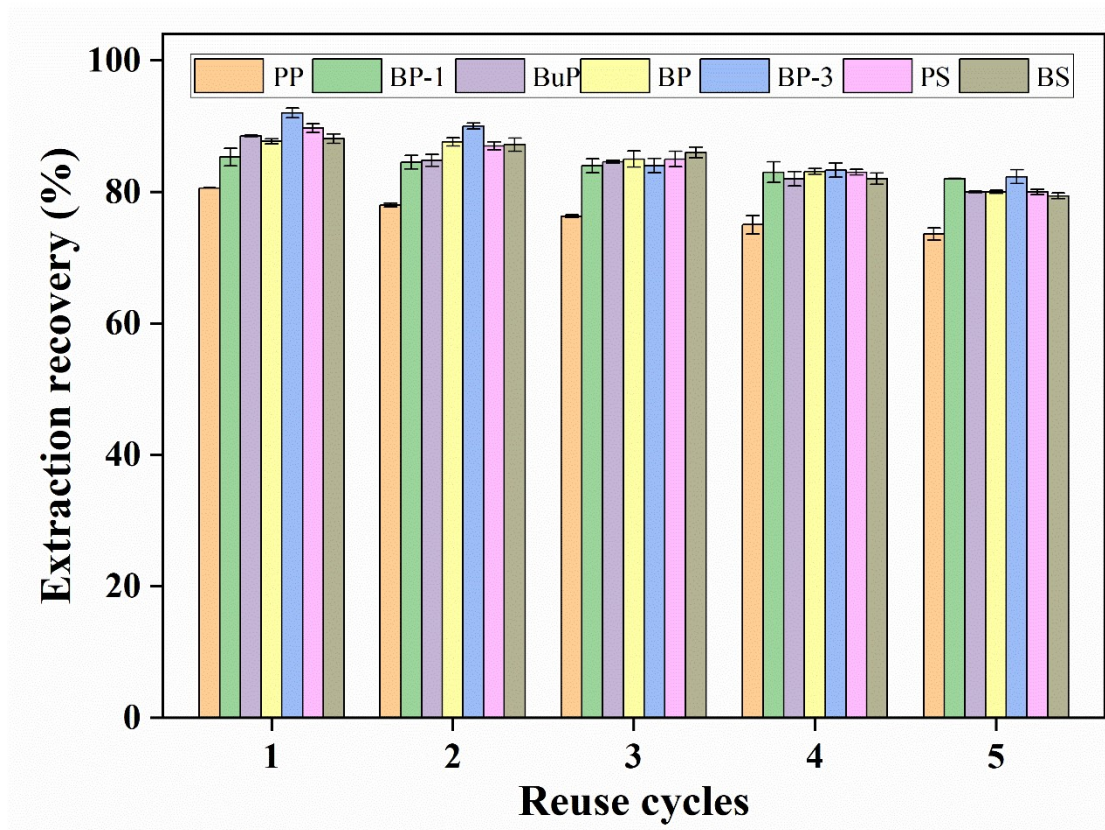

Figure 3 Reusability of  $\text{Fe}_3\text{O}_4\text{@PDA}$  for the preparation of ferrofluids for extraction of UVFs and PBs

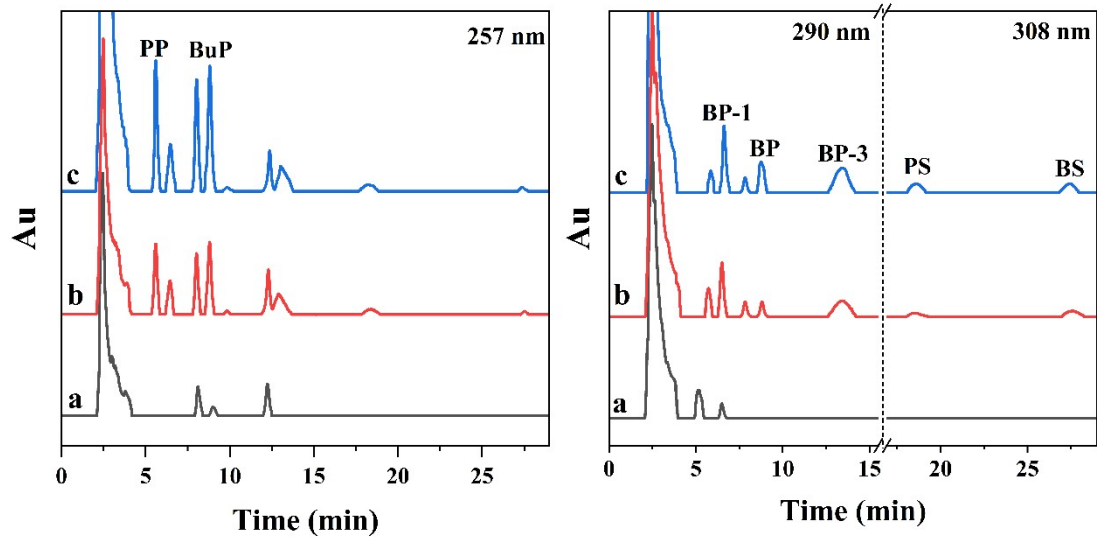

Figure 4 HPLC chromatograms of swimming pool water spiked with (a) 0, (b) 20 and (c)  $50 \mu\text{g}\cdot\text{L}^{-1}$  of PP, BuP, BP-1, BP, BP-3, PS and BS.

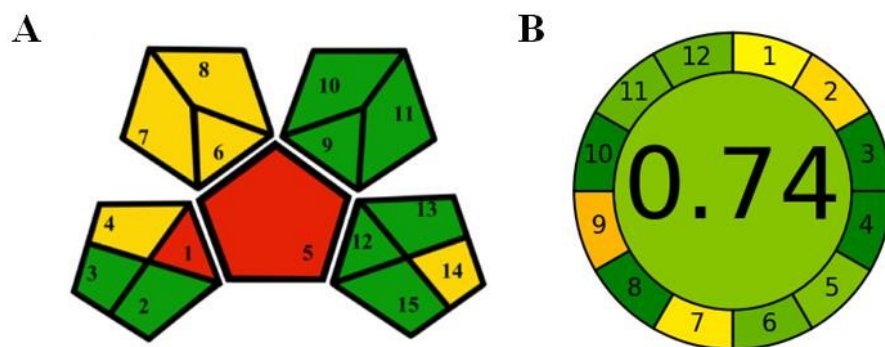

Figure 5 (A) Assessment of the green profile of the method based on the Green Analytical Procedure Index GAPI tool. (B) AGREE for the proposed method.

Table 1 Structures and LogKow of the studied UV filters and preservatives

| Analyte | Structural formula                                                                  | Molecular formula                              | LogKow <sup>a</sup> |
|---------|-------------------------------------------------------------------------------------|------------------------------------------------|---------------------|
| PP      | 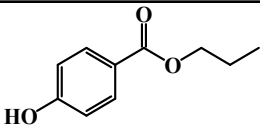   | C <sub>10</sub> H <sub>12</sub> O <sub>3</sub> | 2.93                |
| BP-1    |    | C <sub>13</sub> H <sub>10</sub> O <sub>3</sub> | 2.96                |
| BP      |    | C <sub>13</sub> H <sub>10</sub> O              | 3.18                |
| BuP     |    | C <sub>11</sub> H <sub>14</sub> O <sub>3</sub> | 3.57                |
| BP-3    |    | C <sub>14</sub> H <sub>12</sub> O <sub>3</sub> | 3.64                |
| PS      |   | C <sub>13</sub> H <sub>10</sub> O <sub>3</sub> | 3.82                |
| BS      |  | C <sub>14</sub> H <sub>12</sub> O <sub>3</sub> | 4.01                |

<sup>a</sup>: Exper. Ref: Hansch, C et al. (1995)

Table 2 Experimental variables and levels of PBD

| Factors                                                      | Level    |           |
|--------------------------------------------------------------|----------|-----------|
|                                                              | Low (-1) | High (+1) |
| The volume of ferrofluid ( $\mu\text{L}$ )                   | 60       | 100       |
| Vortex time (min)                                            | 1        | 4         |
| Temperature ( $^{\circ}\text{C}$ )                           | 25       | 45        |
| The pH of the sample solution                                | 4        | 6         |
| The concentration of NaCl ( $\text{mol}\cdot\text{L}^{-1}$ ) | 0        | 0.1       |
| The volume of eluent ( $\mu\text{L}$ )                       | 100      | 200       |
| Desorption time (s)                                          | 30       | 90        |

Table 3 Design matrix together with its response

| Factors                                         |  | Level     |     |     |     |           |
|-------------------------------------------------|--|-----------|-----|-----|-----|-----------|
|                                                 |  | $-\alpha$ | -1  | 0   | 1   | $+\alpha$ |
| (X <sub>1</sub> ) The volume of ferrofluid (μL) |  | 66.36     | 80  | 100 | 120 | 133.64    |
| (X <sub>2</sub> ) Vortex time (min)             |  | 1.32      | 2   | 3   | 4   | 4.68      |
| (X <sub>3</sub> ) The volume of eluent (μL)     |  | 115.91    | 150 | 200 | 250 | 284.09    |

  

| Run order | X <sub>1</sub> | X <sub>2</sub> | X <sub>3</sub> | Response (%) |      |
|-----------|----------------|----------------|----------------|--------------|------|
|           |                |                |                | PBs          | UVFs |
| 1         | 100            | 3              | 200            | 83.3         | 89.6 |
| 2         | 80             | 2              | 250            | 75.4         | 80.6 |
| 3         | 133.64         | 3              | 200            | 81.2         | 85.6 |
| 4         | 100            | 3              | 200            | 82.2         | 88.9 |
| 5         | 100            | 3              | 200            | 83.4         | 89.5 |
| 6         | 100            | 3              | 284.09         | 82.5         | 88.1 |
| 7         | 100            | 1.32           | 200            | 77.3         | 84.1 |
| 8         | 66.36          | 3              | 200            | 61.9         | 67.9 |
| 9         | 80             | 4              | 150            | 62.4         | 68.9 |
| 10        | 100            | 4.68           | 200            | 81.2         | 87.2 |
| 11        | 120            | 2              | 200            | 73.5         | 79.9 |
| 12        | 80             | 4              | 250            | 76.1         | 82.4 |
| 13        | 100            | 3              | 200            | 82.8         | 89.9 |
| 14        | 120            | 4              | 150            | 74.5         | 80.0 |
| 15        | 120            | 4              | 250            | 83.4         | 89.2 |
| 16        | 100            | 3              | 200            | 82.3         | 88.1 |
| 17        | 100            | 3              | 200            | 82.4         | 88.0 |
| 18        | 100            | 3              | 115.91         | 59.2         | 68.2 |
| 19        | 80             | 2              | 150            | 57.6         | 65.4 |
| 20        | 120            | 2              | 250            | 82.7         | 88.2 |

Table 4 Results of ANOVA analysis for CCD (UVFs,  $\alpha=1.682$ )

| Source of variation           | Sum of squares | Degree of freedom | Mean squares | F-value | p-value |
|-------------------------------|----------------|-------------------|--------------|---------|---------|
| Model                         | 1306.62        | 9                 | 145.18       | 304.85  | <0.0001 |
| X <sub>1</sub>                | 356.42         | 1                 | 356.42       | 748.41  | <0.0001 |
| X <sub>2</sub>                | 9.88           | 1                 | 9.88         | 20.74   | 0.0011  |
| X <sub>3</sub>                | 464.74         | 1                 | 464.74       | 975.87  | <0.0001 |
| X <sub>1</sub> X <sub>2</sub> | 2.20           | 1                 | 2.20         | 4.63    | 0.0569  |
| X <sub>1</sub> X <sub>3</sub> | 15.68          | 1                 | 15.68        | 32.93   | 0.0002  |
| X <sub>2</sub> X <sub>3</sub> | 0.080          | 1                 | 0.080        | 0.17    | 0.6906  |
| X <sub>1</sub> <sup>2</sup>   | 278.91         | 1                 | 278.91       | 585.67  | <0.0001 |
| X <sub>2</sub> <sup>2</sup>   | 22.61          | 1                 | 22.61        | 47.49   | <0.0001 |
| X <sub>3</sub> <sup>2</sup>   | 219.68         | 1                 | 219.68       | 461.29  | <0.0001 |
| Residual                      | 4.76           | 10                | 0.48         |         |         |
| Lack of Fit                   | 1.52           | 5                 | 0.30         | 0.47    | 0.7866  |
| Pure Error                    | 3.24           | 5                 | 0.65         |         |         |
| Cor Total                     | 1311.39        | 19                |              |         |         |
| R-Sq= 99.64%                  |                |                   |              |         |         |
| R-Sq(adj)= 99.31%             |                |                   |              |         |         |
| R-Sq(pred)= 98.66%            |                |                   |              |         |         |

Table 5 Performance characteristics of the HDES-FF-VA-LLME

| Analyte | Liner range<br>( $\mu\text{g L}^{-1}$ ) | $R^2$  | LOD<br>( $\mu\text{g L}^{-1}$ ) | LOQ<br>( $\mu\text{g L}^{-1}$ ) | Inter-day<br>RSD (%) | Intra-day<br>RSD (%) | EF | ME<br>(%) |
|---------|-----------------------------------------|--------|---------------------------------|---------------------------------|----------------------|----------------------|----|-----------|
| PP      | 0.2-200                                 | 0.9994 | 0.05                            | 0.2                             | $\leq 2.3$           | $\leq 1.7$           | 22 | -3.1      |
| BuP     | 0.5-200                                 | 0.9986 | 0.1                             | 0.5                             | $\leq 2.1$           | $\leq 2.2$           | 25 | 1.3       |
| BP-1    | 0.5-200                                 | 0.9983 | 0.1                             | 0.5                             | $\leq 3.3$           | $\leq 2.1$           | 28 | -1.3      |
| BP      | 0.2-400                                 | 0.9993 | 0.05                            | 0.2                             | $\leq 0.2$           | $\leq 3.0$           | 29 | -3.5      |
| BP-3    | 0.2-400                                 | 0.9987 | 0.05                            | 0.2                             | $\leq 0.9$           | $\leq 1.6$           | 26 | 3.1       |
| PS      | 0.5-400                                 | 0.9990 | 0.1                             | 0.5                             | $\leq 1.9$           | $\leq 1.6$           | 24 | 1.2       |
| BS      | 1.0-400                                 | 0.9994 | 0.25                            | 1.0                             | $\leq 1.5$           | $\leq 1.5$           | 25 | 1.0       |
